# Supplementary material for: Differences in the Prevalence of Non-Communicable Disease between Slum Dwellers and the General Population in a Large Urban Area in Brazil
Source: PubMed Central journal article supplement (PMC6082112; doi:10.3390/tropicalmed2030047), 2017-09-16
Supplement: tropicalmed-02-00047-s001.pdf [file tropicalmed-02-00047-s001.pdf]

**Table S1.** Age- and sex-adjusted total, sex-adjusted age-specific and age-adjusted sex-specific prevalences of non-communicable diseases and risk factors in Pau da Lima (PDL), Salvador, Brazil, 2010 and the 2010 Vigilte telephone survey in Salvador.

|                                    | Pop.    | Total |            | Sex  |            |        |            | Age   |            |       |            |       |            |      |            |
|------------------------------------|---------|-------|------------|------|------------|--------|------------|-------|------------|-------|------------|-------|------------|------|------------|
|                                    |         | %     | 95% CI     | Male |            | Female |            | 18–24 |            | 25–39 |            | 40–59 |            | ≥60  |            |
|                                    |         |       |            | (%)  | 95% CI     | (%)    | 95% CI     | (%)   | 95% CI     | (%)   | 95% CI     | (%)   | 95% CI     | (%)  | 95% CI     |
| Diabetes mellitus                  | PDL     | 10.1  | 7.9, 12.3  | 10.0 | 8.4, 11.5  | 10.45  | 8.9, 12.0  | 1.7   | 1.3, 2.1   | 5.1   | 4.1, 6.1   | 10.8  | 9.6, 11.9  | 36.5 | 35.0, 38.0 |
|                                    | Vigitel | 5.2   | 4.2, 6.1   | 5.0  | 4.3, 5.6   | 5.3    | 4.7, 5.9   | 1.8   | 1.6, 2.1   | 2.4   | 1.9, 2.8   | 6.1   | 5.5, 6.7   | 15.9 | 15.5, 16.4 |
| Hypertension                       | PDL     | 23.6  | 20.9, 26.4 | 19.3 | 17.4, 21.2 | 29.3   | 27.3, 31.3 | 2.3   | 1.9, 2.7   | 13.9  | 12.5, 15.4 | 35.2  | 33.4, 36.9 | 62.1 | 60.6, 63.6 |
|                                    | Vigitel | 22.9  | 21.2, 24.6 | 20.3 | 19.1, 21.6 | 25.6   | 24.4, 26.8 | 6.2   | 5.7, 6.7   | 13.9  | 12.9, 14.9 | 30.9  | 29.9, 32.0 | 55.5 | 54.8, 56.1 |
| Dyslipidemia <sup>1</sup>          | PDL     | 22.7  | 19.8, 25.5 | 17.5 | 15.5, 19.5 | 29.7   | 27.7, 31.7 | 6.0   | 5.3, 6.7   | 15.1  | 13.4, 16.7 | 31.5  | 29.7, 33.2 | 58.3 | 56.8, 59.8 |
|                                    | Vigitel | 21.5  | 19.7, 23.4 | 19.2 | 17.9, 20.5 | 24.9   | 23.6, 26.2 | 11.3  | 10.5, 12   | 14.1  | 12.9, 15.2 | 31.5  | 30.4, 32.6 | 39.0 | 38.5, 39.6 |
| Overweight or obesity <sup>2</sup> | PDL     | 46.5  | 43.1, 49.9 | 42.8 | 40.3, 45.2 | 52.0   | 49.6, 54.4 | 19.4  | 18.3, 20.6 | 50.9  | 48.7, 53.1 | 40.5  | 38.6, 42.3 | 56.9 | 55.4, 58.4 |
|                                    | Vigitel | 40.6  | 38.5, 42.8 | 44.1 | 42.5, 45.7 | 36.3   | 34.8, 37.7 | 21.6  | 20.8, 22.4 | 38.1  | 36.7, 39.6 | 47.9  | 46.8, 49.1 | 43.3 | 42.7, 44   |
| Obesity <sup>3</sup>               | PDL     | 15.2  | 12.7, 17.7 | 11.3 | 9.7, 12.9  | 20.2   | 18.2, 22.1 | 5.3   | 4.6, 5.9   | 18.4  | 16.8, 20.1 | 20.9  | 19.4, 22.4 | 11.4 | 10.4, 12.4 |
|                                    | Vigitel | 11.1  | 9.3, 12.9  | 10.2 | 9.2, 11.2  | 12.1   | 11.2, 13.1 | 3.7   | 3.3, 4.1   | 10.1  | 9.2, 11    | 15.9  | 15.0, 16.7 | 13.1 | 12.7, 13.5 |
| Active smoker                      | PDL     | 14.5  | 12.1, 17   | 18.2 | 16.2, 20.2 | 9.9    | 8.5, 11.3  | 9.4   | 8.5, 10.3  | 13.6  | 12, 15.1   | 16.9  | 15.5, 18.3 | 11.6 | 10.6, 12.6 |
|                                    | Vigitel | 8.3   | 7.1, 9.5   | 9.5  | 8.6, 10.5  | 6.6    | 5.9, 7.3   | 4.8   | 4.4, 5.2   | 6.2   | 5.4, 6.9   | 11.5  | 10.7, 12.3 | 8.4  | 8.1, 8.8   |

<sup>1</sup>Dyslipidemia estimates from 2013 used, not reported in Vigitel until 2013. <sup>2</sup>Overweight or obesity defined as a BMI  $\geq 25$  kg/m<sup>2</sup>. <sup>3</sup>Obesity defined as a BMI  $\geq 30$  kg/m<sup>2</sup>.
